# Supplementary material for: Aroma Components Analysis and Origin Differentiation of Black Tea Based on ATD-GC-MS and E-Nose
Source: MDPI journal article supplement (doi:10.3390/horticulturae9080885), 2023-08-04
Supplement: s1 [file s1]

The quadratic equation model between the factors is:

$$(Y_1) = 102.13 + 4.92*A + 5.59*B + 3.15*C - 4.2*AB + 2.36*AC - 1.12*BC - 6.52*A^2 - 0.93*B^2 - 6.55*C^2.$$

$$(Y_2) = 91.8 + 3*A + 2*B + 2.5*C + 0.5*AB + 1.5*AC \pm 1.5*BC - 4.15*A^2 - 2.15*B^2 - 2.15*C^2.$$
